# Supplementary material for: Preparation of single-cell suspensions from the human placenta
Source: Springer Nature journal article supplement (doi:10.1038/s41596-022-00772-w), 2022-11-30
Supplement: MOESM1 [file 41596_2022_772_MOESM1_ESM26.pdf]

## Supplementary information

---

# Preparation of single-cell suspensions from the human placenta

---

In the format provided by the authors and unedited

## **Validating the quality of single-cell suspensions by immunophenotyping**

Briefly,  $1 \times 10^6$  cells suspended in 1X PBS were incubated with Fixable Viability Stain 510 (BD Biosciences, cat. no. 564406) for 30 min at 4°C. Next, the cell suspensions were centrifuged at 300 x g for 5 min at 20°C and supernatant was aspirated. Cell pellets were then re-suspended with stain buffer (BD Biosciences, cat. no. 554656) prior to blocking with FcR blocking reagent (Miltenyi Biotec, cat. no. 130-059-901) for 5 min at room temperature (20°C). Fluorochrome-conjugated antibodies (see Supplementary Table 1) were added to stain cellular surface markers and the cells were incubated for 30 min at 4°C. The stained cells were then washed twice with stain buffer (BD Biosciences) and acquired using BD LSR Fortessa flow cytometer and FACSDiva software versions 6.0 and 9.0. Flow cytometer plots were generated and analyzed by FlowJo software version 10.

Supplementary Table 1. Fluorochrome-conjugated antibodies

| <b>Antibody</b>                    | <b>Fluorochrome</b> | <b>Company</b> | <b>Cat. No.</b> | <b>RRID</b>                                                                                             |
|------------------------------------|---------------------|----------------|-----------------|---------------------------------------------------------------------------------------------------------|
| Mouse anti-human CD45              | Alexa Fluor 700     | BD Biosciences | 560566          | <a href="https://scicrunch.org/resolver/AB_1645452">https://scicrunch.org/resolver/AB_1645452</a>       |
| Mouse anti-human CD3               | APC-Cy7             | BD Biosciences | 557832          | <a href="https://scicrunch.org/resolver/AB_396890">https://scicrunch.org/resolver/AB_396890</a>         |
| Mouse anti-human CD4               | BUV737              | BD Biosciences | 612748          | <a href="https://scicrunch.org/resolver/AB_2870079">https://scicrunch.org/resolver/AB_2870079</a>       |
| Mouse anti-human CD8               | BV786               | BD Biosciences | 563823          | <a href="https://scicrunch.org/resolver/AB_2687487">https://scicrunch.org/resolver/AB_2687487</a>       |
| Mouse anti-human CD14              | BUV395              | BD Biosciences | 563561          | <a href="https://scicrunch.org/resolver/AB_2744288">https://scicrunch.org/resolver/AB_2744288</a>       |
| Mouse anti-human CD15              | BV650               | BD Biosciences | 564232          | <a href="https://scicrunch.org/resolver/AB_2738686">https://scicrunch.org/resolver/AB_2738686</a>       |
| Mouse anti-human CD19              | PE-Cy5              | BD Biosciences | 555414          | <a href="https://scicrunch.org/resolver/AB_395814">https://scicrunch.org/resolver/AB_395814</a>         |
| Mouse anti-human CD56              | BV711               | BD Biosciences | 563169          | <a href="https://scicrunch.org/resolver/AB_2738043">https://scicrunch.org/resolver/AB_2738043</a>       |
| Mouse anti-human CD10              | PE                  | BD Biosciences | 555375          | <a href="https://scicrunch.org/resolver/AB_395775">https://scicrunch.org/resolver/AB_395775</a>         |
| Mouse anti-human CK7 (Cytokeratin) | FITC                | Millipore      | CBL194F         | <a href="https://scicrunch.org/resolver/AB_93342">https://scicrunch.org/resolver/AB_93342</a>           |
| Mouse anti-human Vimentin          | PE                  | BD Biosciences | 562337          | <a href="https://scicrunch.org/resolver/AB_10897167">https://scicrunch.org/resolver/AB_10897167</a>     |
| Mouse anti-human CD31              | APC-Cy7             | BD Biosciences | 563653          | <a href="https://scicrunch.org/resolver/%20AB_2738350">https://scicrunch.org/resolver/%20AB_2738350</a> |
| Mouse anti-human CD34              | BV 605              | BD Biosciences | 745105          | <a href="https://scicrunch.org/resolver/AB_2742712">https://scicrunch.org/resolver/AB_2742712</a>       |
| Mouse anti-human CD29              | BV421               | BD Biosciences | 743783          | <a href="https://scicrunch.org/resolver/AB_2741751">https://scicrunch.org/resolver/AB_2741751</a>       |
